# Supplementary material
Source: publisher figshare collection journal article supplement (https://frontiersin.figshare.com/ndownloader/files/15296855)
Supplement: Supplementary file [file 15296855]

## *Supplementary Material*

### **1. Supplementary Files**

#### **1.1 Study protocol.**

Patients were examined by Gd-DTPA-enhanced MRI at a maximum of 1 week prior to surgery using automatic registration tools based on preoperative 3D T1 magnetization-prepared rapid acquisition gradient echo (3D-MPRAGE) scan. All patients then underwent neuro-navigation assisted tumor resection. First, a typical white light microscope resection was carried out under neuro-navigation guidance to completely remove the recurrent tumor as judged by the surgeon. After selection of tissue for pathology by the neurosurgeon, according to clinical experience, the rest of the specimen was transferred to liquid nitrogen for future imaging with the IVIS living system. Tissues that were identified using the GGT-responsive fluorescent probe were harvested and fixed for pathology diagnosis.

#### **1.2 Cell viability assay.**

NHA cells were incubated with the fluorescent probe CN-BOD-GSH (100  $\mu$ M) for 12 and 24 h. Next, 10  $\mu$ L of CCK-8 (Dojindo, Japan) solution was added to the mixture and incubated for another 4 h. The optical density at 450 nm was determined using a microplate reader.

#### **1.3 Western blot analysis.**

Cell lysates (100  $\mu$ g protein from  $10^6$  U87R, U251R and NHA cells) or glioma samples (300  $\mu$ g) were separated on a 10% SDS-PAGE gel and then transferred onto a nitrocellulose membrane. The membranes were then incubated in blocking buffer (5% skim milk) for 1 h, followed by treatment with primary antibodies overnight at 4°C. Primary antibodies were GGT-1 (Sigma, SAB1405865, 1:100) and GAPDH (Santa Cruz, SAB1405865, as the endogenous control). The membranes were rinsed and incubated in horseradish peroxidase-conjugated secondary antibody for 1 h. Protein bands were visualized by using enhanced chemiluminescence (ECL) using western blot detection system (Bio-Rad Laboratories, Hercules, CA, USA).

## 2. Supplementary Figures

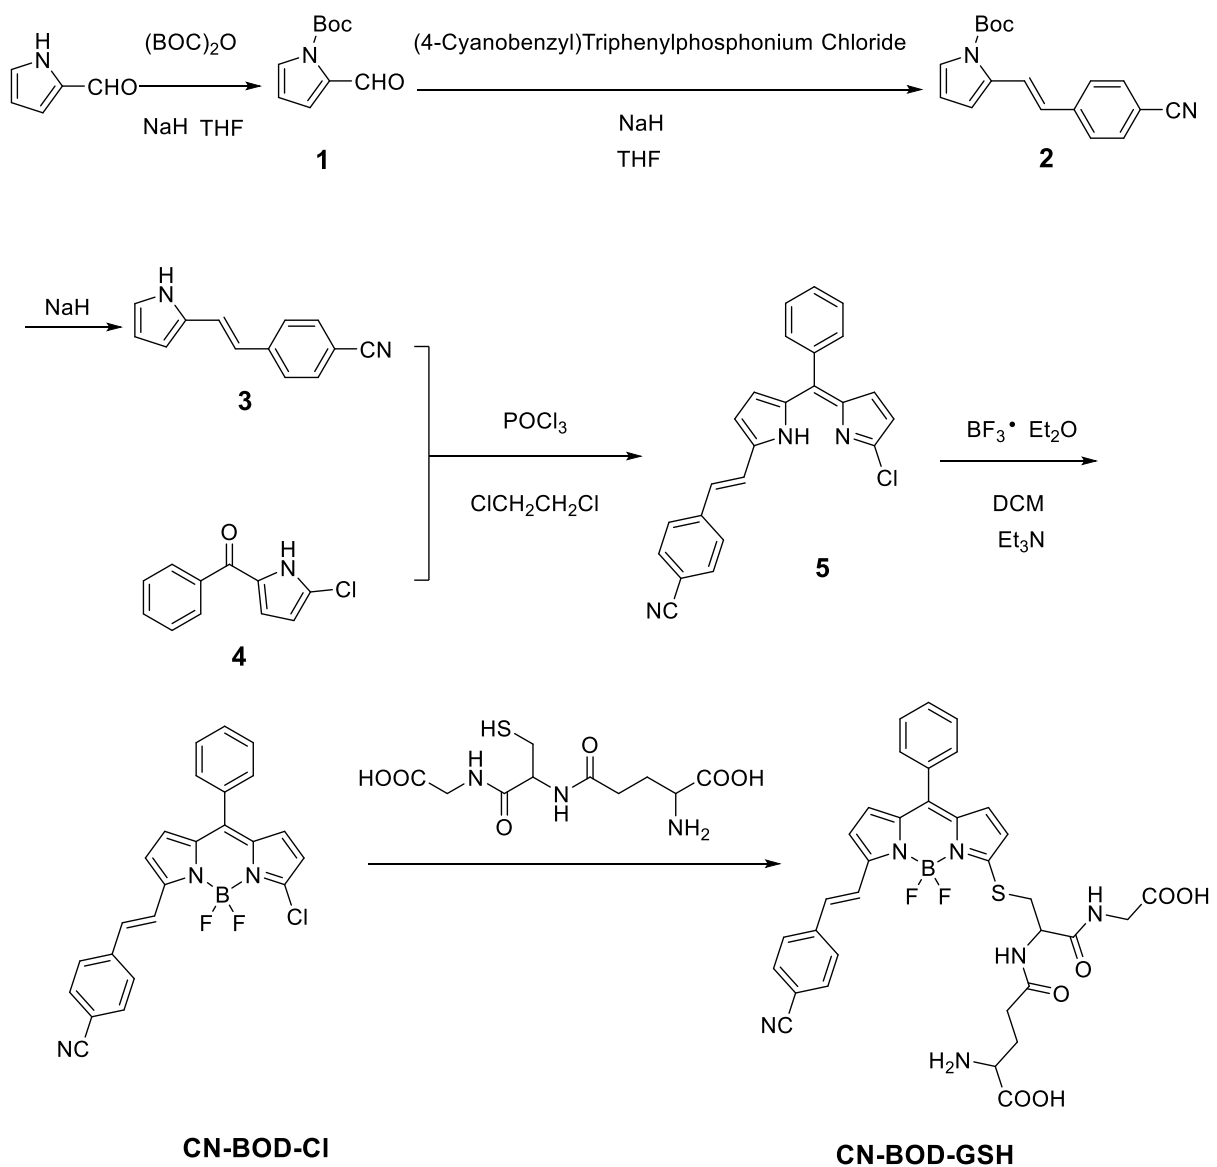

### 2.1 Supplementary Figure 1. Work-flow of the Synthesis of the CN-BOD-GSH probe.

## Elemental Composition Report

### Single Mass Analysis

Tolerance = 30.0 PPM / DBE: min = -1.5, max = 100.0

Element prediction: Off

Number of isotope peaks used for i-FIT = 2

Monoisotopic Mass, Even Electron Ions

545 formula(e) evaluated with 1 results within limits (up to 1 best isotopic matches for each mass)

Elements Used:

C: 0-29 H: 0-24 N: 0-5 O: 0-3 S: 0-1 F: 0-2 K: 0-1 10B: 0-1

CC-ZHAO

ECUST institute of Fine Chem

ZC-ZZY-001 112 (1.464) Cm (111:112)

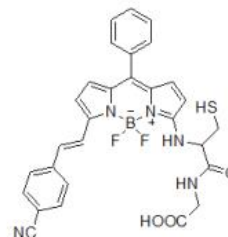

17-Jan-2018  
21:46:57  
1: TOF MS ES+  
2.03e+000

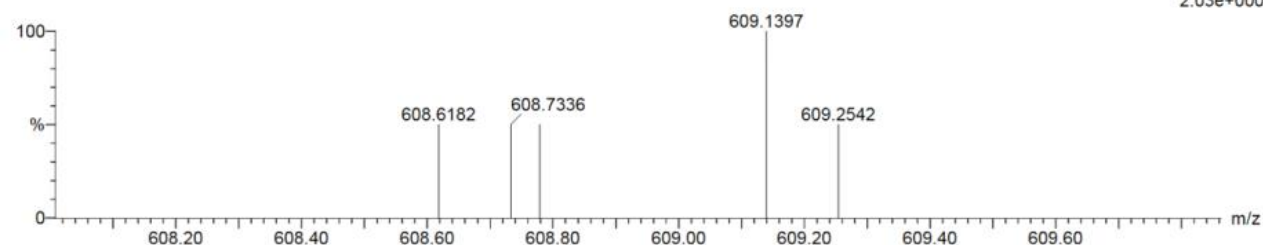

Minimum:

Maximum:

30.0

30.0

-1.5

100.0

| Mass | Calc. Mass | mDa | PPM | DBE | i-FIT | i-FIT (Norm) | Formula |
|------|------------|-----|-----|-----|-------|--------------|---------|
|------|------------|-----|-----|-----|-------|--------------|---------|

|          |          |     |      |      |      |     |                                                                                         |
|----------|----------|-----|------|------|------|-----|-----------------------------------------------------------------------------------------|
| 609.1397 | 609.1334 | 6.3 | 10.3 | 19.5 | 12.1 | 0.0 | C <sub>29</sub> H <sub>24</sub> N <sub>5</sub> O <sub>3</sub> S F <sub>2</sub> K<br>10B |
|----------|----------|-----|------|------|------|-----|-----------------------------------------------------------------------------------------|

**2.2 Supplementary Figure 2.** HRMS for confirmation of GGT catalyzed transformation of CN-BOD-GSH to CN-BOD-N ( $[M + K]^+ = 609.1397$ ). HRMS was obtained at 40 min post addition of GGT to the solution of CN-BOD-GSH.

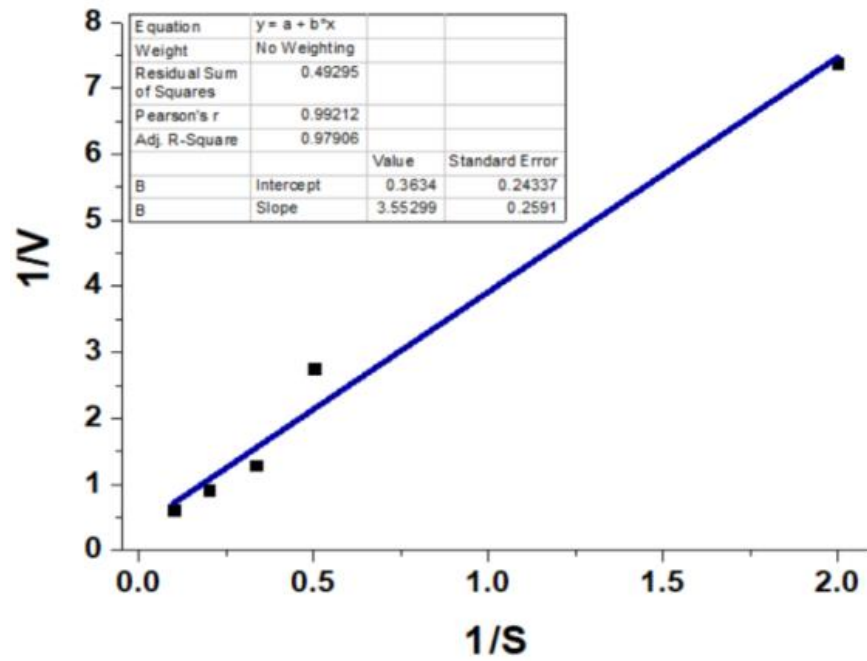

**2.3 Supplementary Figure 3.** Linear correlation between  $1/V$  and of  $1/S$ . Equation (1) and (2) can be derived from the Michaelis-Menten equation, where  $V$  represents the velocity,  $S$  is the substrate concentration and  $K_m$  is the Michaelis constant. From the linear plot, the slope and the intercept can be determined.  $K_m$  and  $V_{max}$  were calculated to be  $9.78 \mu\text{M}$  and  $2.75 \mu\text{M} \cdot \text{min}^{-1}$ , respectively.

$$V = V_{max} \times [S] / (K_m + [S]) \quad (1)$$

$$1/V = (K_m/V_{max}) \times (1/[S]) + 1/V_{max} \quad (2)$$

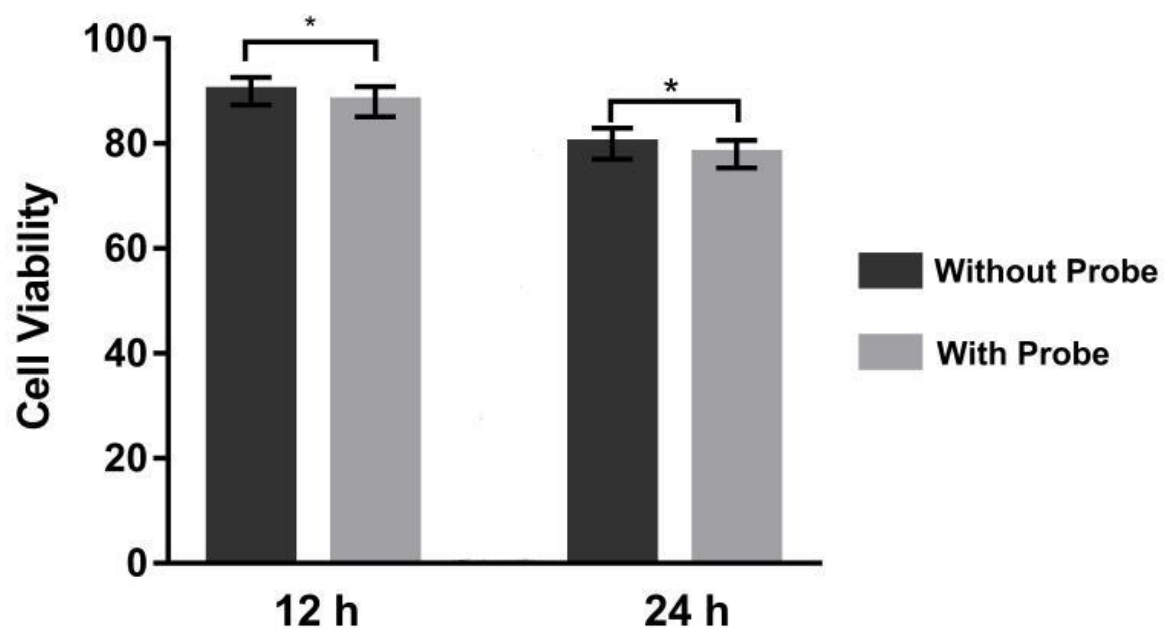

**2.4 Supplementary Figure 4.** CCK-8 cell viability assay in NHA cells treated with 100  $\mu$ M of the CN-BOD-GSH probe for 12 h and 24 h. Experiments were performed in triplicate; Statistics analysis are performed by Student's t -test with the significance of P-valuation, \*P>0.05.

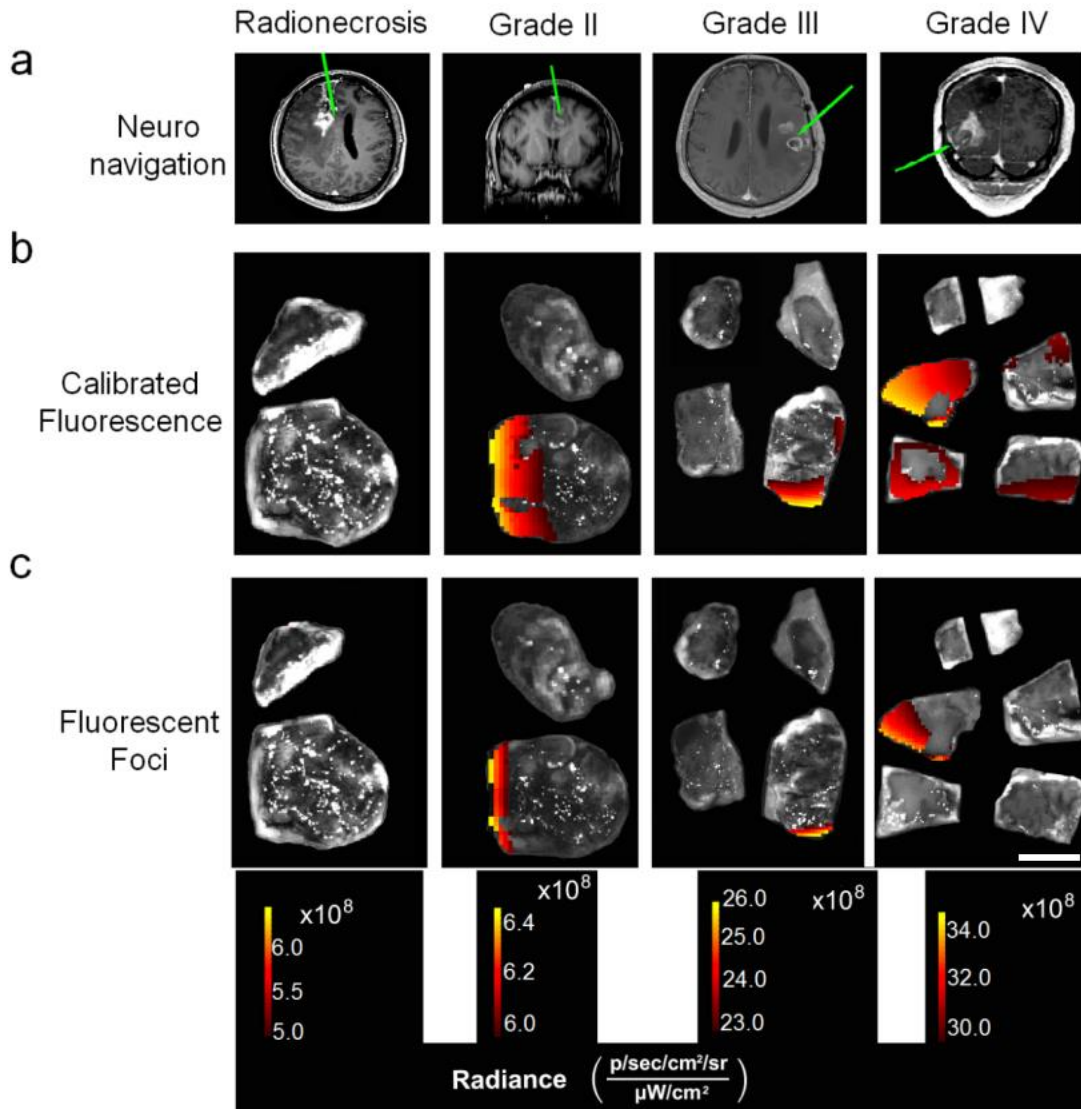

**2.5 Supplementary Figure 5.** (a) Tissues resected under neuro-navigation guidance after post-radio/chemotherapy. (b) The calibrated fluorescence in tissues after subtraction of the background fluorescence of the adjacent healthy tissue. (c) Continuous subtraction of background fluorescence in experimental tissues identifies the fluorescent foci for pathological diagnosis. Scale bars 10mm for all fluorescence images.

## Supplementary Tables

**Table S1.** Patient's Information, pathological diagnosis and prognosis.

| Patient ID | Sex | Age | Traditional diagnosis | WHO Grade | Ki-67 (%) | Fluorescent Foci | Diagnosis with CN-BOD-GSH | WHO Grade | Ki-67 (%) | Survival (Months) |
|------------|-----|-----|-----------------------|-----------|-----------|------------------|---------------------------|-----------|-----------|-------------------|
| T01        | M   | 54  | radionecrosis         | 0         | 4         | No               | radionecrosis             | 0         | 4.5       | 8                 |
| T02        | F   | 62  | radionecrosis         | 0         | 3         | No               | radionecrosis             | 0         | 2         | 10                |
| T03        | F   | 33  | radionecrosis         | 0         | 4.5       | No               | radionecrosis             | 0         | 3.4       | 16                |
| T04        | F   | 35  | AC                    | 2         | 12        | Yes              | AC                        | 2         | 9.1       | 26                |
| T05        | M   | 16  | AC                    | 2         | 6         | Yes              | AC                        | 2         | 7.4       | 16                |
| T06        | F   | 49  | AOA                   | 3         | 10        | Yes              | AOA                       | 3         | 13        | 20                |
| T07        | F   | 48  | AOA                   | 3         | 16        | Yes              | AOA                       | 3         | 21        | 9                 |
| T08        | M   | 62  | AA                    | 3         | 14        | Yes              | GBM                       | 4         | 12        | 10                |
| T09        | F   | 56  | AA                    | 3         | 12        | Yes              | AA                        | 3         | 18.5      | 6                 |
| T10        | F   | 49  | Post-irradiation      | 0         | 5         | Yes              | AOA                       | 3         | 15        | 10                |
| T11        | F   | 57  | GBM                   | 4         | 18        | Yes              | GBM                       | 4         | 20        | 6                 |
| T12        | M   | 41  | AA                    | 3         | 10        | Yes              | GBM                       | 4         | 15        | 7                 |
| T13        | F   | 42  | GBM                   | 4         | 17        | Yes              | GBM                       | 4         | 22        | 6                 |
| T14        | M   | 65  | GBM                   | 4         | 22        | Yes              | GBM                       | 4         | 18        | 8                 |
| T15        | F   | 43  | GBM                   | 4         | 20        | Yes              | GBM                       | 4         | 25        | 5                 |
| T16        | F   | 57  | GBM                   | 4         | 15        | Yes              | GBM                       | 4         | 30        | 5                 |
| T17        | M   | 35  | AC                    | 2         | 8         | Yes              | GBM                       | 4         | 42        | 8                 |
| T18        | F   | 43  | GBM                   | 4         | 12        | Yes              | GBM                       | 4         | 15        | 5                 |
| T19        | F   | 49  | GBM                   | 4         | 19        | Yes              | GBM                       | 4         | 35        | 8                 |
| T20        | M   | 13  | GBM                   | 4         | 15        | Yes              | GBM                       | 4         | 30        | 7                 |

AC: astrocytoma; AA: anaplastic astrocytoma; AOA: anaplastic oligodentroastrocytoma; GBM: glioblastoma multiforme.
